# Supplementary material for: Cd(2,2′-bipy)(H2PO4)2: the first cadmium phosphate with an organic amine acting as a ligandElectronic supplementary information (ESI) available: IR spectrum, X-ray powder diffraction patterns (experimental and simulated) and TGA curve for Cd(2,2′-bipy)(H2PO4)2, and table of hydrogen bond lengths and angles. See http://www.rsc.org/suppdata/jm/b2/b211928e/
Source: Royal Society of Chemistry journal article supplement (doi:10.1039/b211928e), 2003-01-17
Supplement: b211928e.doc [file b211928e.doc]

# Supplementary Information

IR spectrum of Cd(2,2’-bipy)(H2PO4)2

Experimental powder X-ray diffraction pattern of Cd(2,2’-bipy)(H2PO4)2


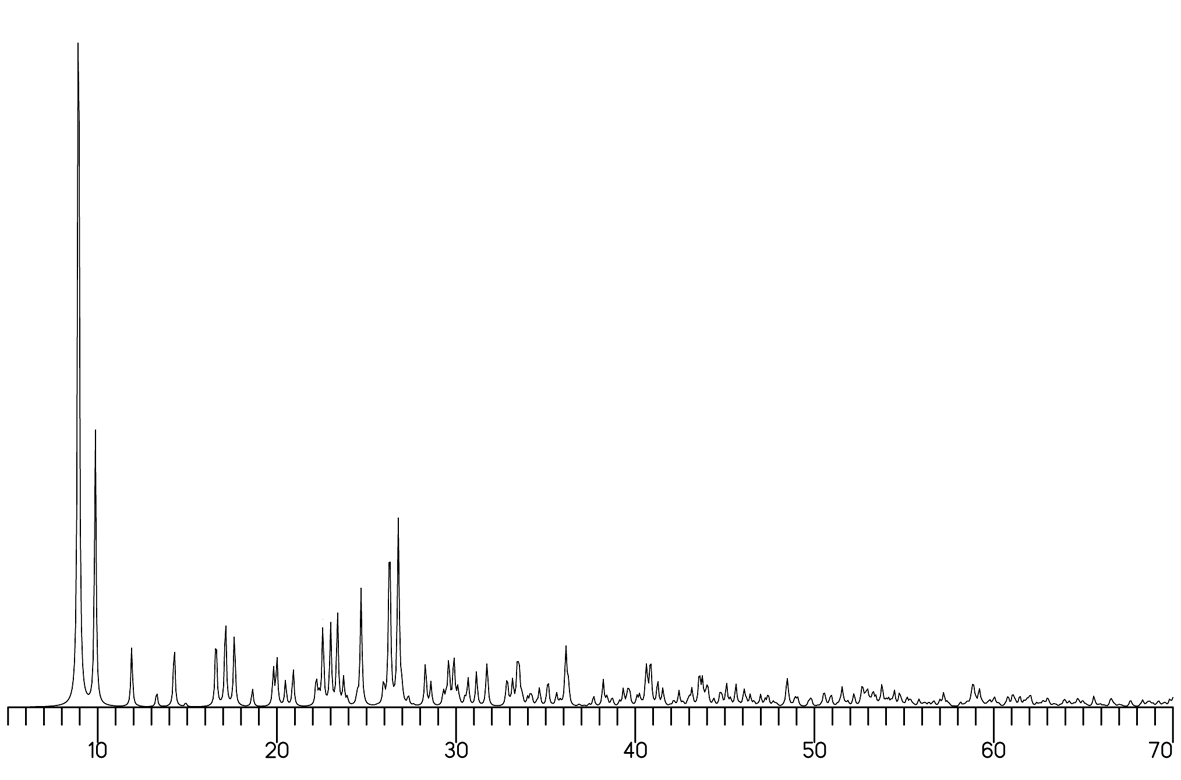


2θ/˚

Simulated powder X-ray diffraction pattern based on the single crystal solution

TGA curve of Cd(2,2’-bipy)(H2PO4)2 under air (10℃/min)

**Table 1** Hydrogen bonds for Cd(2,2’-bipy)(H2PO4)2a

| D-H···A | d(D-H)/Å | D(H···A)/Å | D(D···A)/ Å | Angle D-H/º |
| --- | --- | --- | --- | --- |
| O(4)-H(1)···O(2) #1 | 0.82 | 1.87 | 2.675(8) | 166.8 |
| O5-H2···O8#2 | 0.82 | 1.84 | 2.640(8) | 166.1 |
| O6-H3···O8#3 | 0.82 | 1.80 | 2.601(8) | 166.1 |
| O7-H4···O1 | 0.82 | 1.78 | 2.600(7) | 175.8 |
| aSymmetry transformations used to generate equivalent atoms: #1 -x, y, -z+1/2 #2 -x+1/2, -y+3/2, -z+1 #3 x, -y+1, z-1/2 | | | | |
